# Supplementary material for: Southern Africa: The Missing Piece To The Dust Provenance Puzzle of East Antarctica?
Source: Research Square preprint supplement (doi:10.21203/rs.3.rs-923449/v1), 2021-09-29
Supplement: Supplementary file 1 [file 90933ce8c27648ea09874815.pdf]

## **Southern Africa: The Missing Piece to the Dust Provenance Puzzle of East Antarctica?**

Stefania Gili<sup>a,b,\*</sup>, Aubry Vanderstraeten<sup>a,c</sup>, Amélie Chaput<sup>d</sup>, James King<sup>d</sup>, Diego M. Gaiero<sup>e</sup>, Barbara Delmonte<sup>f</sup>, Paul Vallenga<sup>g</sup>, Paola Formenti<sup>h</sup>, Claudia Di Biagio<sup>h</sup>, Mathieu Cazanau<sup>h</sup>, Edouard Pangui<sup>h</sup>, Jean-François Doussin<sup>i</sup> and Nadine Mattielli<sup>a</sup>

<sup>a</sup>Laboratoire G-Time, Département Géosciences, Environnement et Société (DGES), Université Libre de Bruxelles (ULB), Brussels, Belgium.

<sup>b</sup>Department of Geosciences, Princeton University, Princeton, NJ, USA.

<sup>c</sup>Univ. Littoral Côte d'Opale, CNRS, Univ. Lille, UMR 8187 - LOG - Laboratoire d'Océanologie et de Géosciences, F-62930 Wimereux, France.

<sup>d</sup>Laboratoire d'Érosion Éolienne, Département de Géographie, Université de Montréal, Montréal, Canada.

<sup>e</sup>CICTERRA/CONICET, Universidad Nacional de Córdoba, Córdoba, Argentina.

<sup>f</sup>Department of Environmental and Earth Sciences, University of Milano-Bicocca, Italy.

<sup>g</sup>UWA Oceans Institute, University of Western Australia, Perth, Australia.

<sup>h</sup>Université de Paris and Univ Paris Est Creteil, CNRS, LISA, F-75013 Paris, France.

<sup>i</sup>Univ Paris Est Creteil and Université de Paris, CNRS, LISA, F-94010 Créteil, France

### **Contents of this file**

Text S1: Details on the analytical methodology for Rare Earth Elements and isotopic data

Text S2: Details of the CESAM simulation chamber

Figure S1: Southern Africa PSAs and their parental rock source

### **Text S1**

#### ***Details on the analytical methodology for Rare Earth Elements and isotope data***

The REE, strontium, neodymium and lead isotopes sample preparation were performed in a clean room at the Université Libre de Bruxelles, following previously established procedures in Vanderstraeten et al. (2020). Briefly, samples were digested in teflon vials using a HNO<sub>3</sub> +HF + HCl mixture. After digestion, an aliquot of the samples was analyzed for REE compositions using a Quadrupole ICP-MS Agilent 7700. The rest of each sample was chemically separated using ion-exchange column for the Sr, Nd and Pb isotopic analysis which were analysed on a Nu II Plasma (233) High Resolution-MC-ICP-MS.

**REE:** Quantification of REE was done based on an external calibration curve using a mix of mono-elemental standard solutions. Along with the samples, blanks, and replicates, international reference materials (BHVO-2, AGV-2, BCR-CRM723, ATD) with certified and published geochemical compositions were also measured. The REE concentrations obtained for the reference materials agreed within uncertainty (1 stdv) with those certified and published values (Jochum et al., 2016).

**Lead:** All Pb analyses were conducted in dry plasma mode. The  $^{202}\text{Hg}$  beam intensity, was monitored to correct for interferences of  $^{204}\text{Hg}$  on  $^{204}\text{Pb}$ . Pb isotope ratios were corrected for mass fractionation by adding a Tl solution to standards and samples, normalizing to a  $^{205}\text{Tl}/^{203}\text{Tl}$  value of 2.3885 (Weis et al. 2006). The Tl-corrected values were further adjusted to the NBS981 standard values applying the values of 36.7219 ( $^{208}\text{Pb}/^{204}\text{Pb}$ ), 15.4963 ( $^{207}\text{Pb}/^{204}\text{Pb}$ ) and 16.4905 ( $^{206}\text{Pb}/^{204}\text{Pb}$ ) from Galer and Abouchami (1998). During the course of the study, repeated analyses of NIST SRM 981 provided average values of 36.7220, 15.4963, 16.9405 (2s, n=48), respectively for  $^{208}\text{Pb}/^{204}\text{Pb}$ ,  $^{207}\text{Pb}/^{204}\text{Pb}$  and  $^{206}\text{Pb}/^{204}\text{Pb}$ . These results are in line with the long-term laboratory measurement repeatability of NBS-981 values and also data reported by Weis et al. (2006).

**Neodymium:** Nd and the Rennes Nd calibrator solution (Chauvel and Blichert-Toft 2001) were run at ~25 ppb concentrations in 0.05%  $\text{HNO}_3$  reaching ~2.5 V on the  $^{144}\text{Nd}$  mass.  $^{147}\text{Sm}$  and  $^{140}\text{Ce}$  were monitored through every run. Neodymium isotopic compositions were corrected by internal normalization to the value of  $^{146}\text{Nd}/^{144}\text{Nd} = 0.7219$  (Hamilton *et al.* 1983); the correction was applied relative to its internationally accepted value ( $^{143}\text{Nd}/^{144}\text{Nd} = 0.511961 \pm 0.000013$ , Chauvel and Blichert-Toft 2001). An average value of  $^{143}\text{Nd}/^{144}\text{Nd} = 0.511962 \pm 0.000010$  (2s, n=42) was obtained for the Rennes Nd calibrator during our sessions. For convenience, Nd isotope data is reported in units of  $(\epsilon\text{Nd}(0) = ([^{143}\text{Nd}/^{144}\text{Nd}(\text{meas.})/^{143}\text{Nd}/^{144}\text{Nd}(\text{CHUR})] - 1) \times 10^4)$ , where the CHUR (Chondritic Uniform Reservoir) value is 0.512638 (Jacobsen and Wasserburg, 1980).

**Strontium:** Sr and Sr NBS 987 calibrator solution were performed in wet mode with an intensity of 6.0 V measured on the  $^{88}\text{Sr}$  mass.  $^{83}\text{Kr}$  was monitored through every run to correct for interference on  $^{84}\text{Sr}$  and  $^{86}\text{Sr}$ . Interference of Rb on  $^{87}\text{Sr}$  was also monitored through measurement of  $^{85}\text{Rb}$ . Data was corrected using an  $^{87}\text{Sr}/^{86}\text{Sr}$  value of  $0.710252 \pm 0.000013$  from Weis et al. (2006).  $^{86}\text{Sr}/^{88}\text{Sr} = 0.1194$ . Repeated analyses of Sr NBS 987 yielded an average value of  $^{87}\text{Sr}/^{86}\text{Sr} = 0.710246 \pm 0.000025$  (2s, n=45).

## Text S2

### *Details of the CESAM simulation chamber*

Samples of airborne mineral dust aerosols from the Huab bulk sediments were obtained through experiments performed in the CESAM (French acronym for Experimental Multiphasic Atmospheric Simulation Chamber) atmospheric simulation chamber, at LISA, Créteil (Wang et al., 2011). CESAM consists of a stainless-steel chamber with a volume of 4.2 m<sup>3</sup>, with a design that allows working at levels of concentration representative of processes occurring in the natural atmospheres. The generation of airborne dust was made using a vibrating plate and a Büchner flask containing the soil sample. About 15 g of soil sample was placed in the flask and shaken for ~15 min at 100 Hz to mimic the saltation and sandblasting processes responsible for the release of mineral dust in natural conditions (Caponi et al., 2017).

Prior to each experiment, the chamber was evacuated and kept at a pressure of  $3 \times 10^{-4}$  hPa. Then, the reactor was filled with a mixture of 80 % N<sub>2</sub> and 20 % O<sub>2</sub>. The dust suspension in the flask was injected into the chamber by flushing it with N<sub>2</sub> at 10 L min<sup>-1</sup> for about 10–15 min, whilst continuously shaking the soil. The dust aerosols were left in suspension within the chamber for a time period of ~180 min. Dust samples were collected on polycarbonate filters (47 mm Nuclepore, Whatman, nominal pore size 0.4 µm) by extracting air from the chamber over the course of each experiment. Dust samples were recovered in acid-cleaned (HCl) 0.2 µm Teflon filters. All experiments were conducted at ambient temperature and relative humidity < 2 %. The chamber was manually cleaned between the different experiments to avoid any contamination.

**Figure S1**

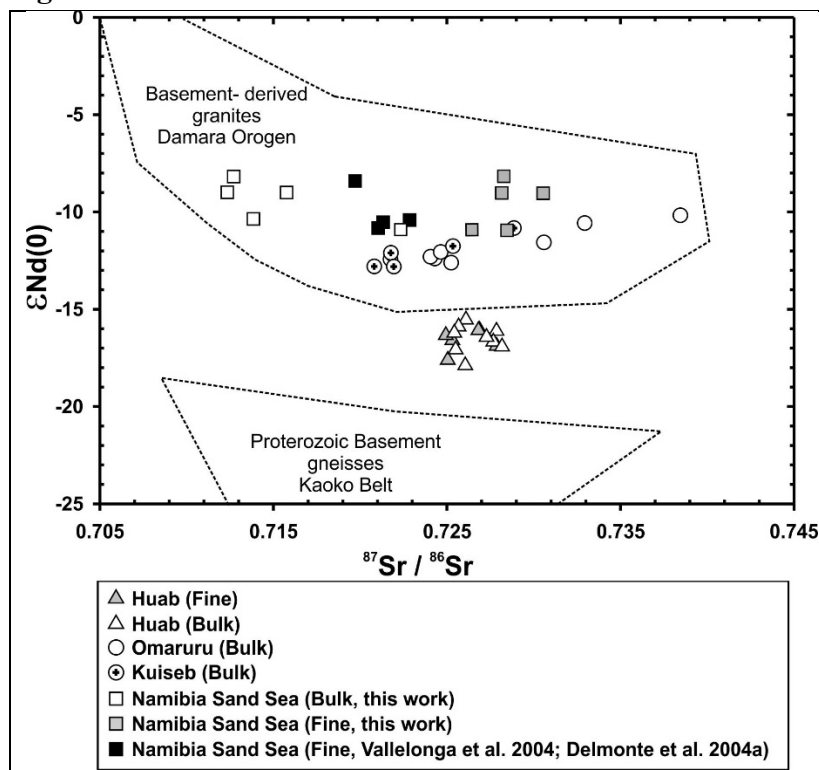

**Figure S1.** Relationship between  $^{87}\text{Sr}/^{86}\text{Sr}$  and  $\epsilon\text{Nd}(0)$  for surface sediments from the Southern Africa potential source areas compared with similar information for the most abundant igneous-metamorphic rocks present in the area. Rock data is from GEOROC database, <http://georoc.mpch-mainz.gwdg.de>.

## References:

- Caponi, L., Formenti, P., Massabó, D., Di Biagio, C., Cazaunau, M., Pangui, E., Chevaillier, S., Landrot, G., Andreae, M. O., Kandler, K., Piketh, S., Saeed, T., Seibert, D., Williams, E., Balkanski, Y., Prati, P., and Doussin, J.-F., (2017). Spectral- and size-resolved mass absorption efficiency of mineral dust aerosols in the shortwave spectrum: a simulation chamber study, *Atmos. Chem. Phys.*, 17, 7175–7191, <https://doi.org/10.5194/acp-17-7175-2017>
- Chauvel C. and Blichert-Toft J., (2001). A hafnium isotope and trace element perspective on melting of the depleted mantle. *Earth and Planetary Science Letters*, 190, 137–151.
- Galer S.J.G. and Abouchami W. (1998) Practical application of lead triple spiking for correction of instrumental mass discrimination. *Mineral Magazine*, A62, 491–492.
- Jacobsen, S.B. and Wasserburg, G.J., (1980). Sm-Nd isotopic evolution of chondrites, *Earth and Planetary Science Letters*, Volume 50, Pages 139-155, [doi.org/10.1016/0012-821X\(80\)90125-9](https://doi.org/10.1016/0012-821X(80)90125-9).
- Jochum, K.P., Weis, U., Schwager, B., Stoll, B., Wilson, S.A., Haug, G.H., Andreae, M.O. and Enzweiler, J. (2016), Reference Values Following ISO Guidelines for Frequently Requested Rock Reference Materials. *Geostand Geoanal Res*, 40: 333-350. <https://doi.org/10.1111/j.1751-908X.2015.00392.x>
- Vanderstraeten, A., Bonneville, S., Gili, S., Jong, J., Debouge, W., Claeys, P., Mattielli, N. (2020) First Multi-Isotopic (Pb-Nd-Sr-Zn-Cu-Fe) Characterisation of Dust Reference Materials (ATD and BCR-723): A Multi-Column Chromatographic Method Optimised to Trace Mineral and Anthropogenic Dust Sources. *Geostandards and Geoanalytical Research* ggr.12320.

Weis D., Kieffer B., Maerschalk C., Barling J., de Jong J., Williams G., Hanano D., Pretorius W., Mattielli N., Scoates J., Goolaerts A., Friedman R. and Mahoney J. (2006) High-precision isotopic characterization of USGS reference materials by TIMS and MC-ICP-MS: Isotopic study of USGS reference materials. *Geochemistry, Geophysics, Geosystems*, 7(8).
