# Supplementary material for: Southern Africa: The Missing Piece To The Dust Provenance Puzzle of East Antarctica?
Source: Research Square preprint supplement (doi:10.21203/rs.3.rs-923449/v1), 2021-09-29
Supplement: Supplementary file 2 [file 3607636034171ebcf146746e.xlsx]

## Sheet: Table S1
Table S1: Location, chemical and isotopic (Sr-Nd-Pb) composition of surface sediments from potential dust source areas (PSAs) of Southern Africa.
For Sr and Nd isotopes ratios, the 2s error is the absolute error value of the individual sample analysis (internal error) and reported as times 106.
For Pb isotopic ratios, the 2s error is the absolute error value of the individual sample analysis (internal error).
Sample ID	Location	87Sr/86Sr	Error 2 σ	143 Nd/144 Nd	Error 2σ	εNd(0)	206Pb/204Pb	Error 2σ	207Pb/204Pb	Error 2σ	208Pb/204Pb	Error 2σ	206Pb/207Pb	208Pb/207Pb	La	Ce	Pr	Nd	Sm	Eu	Gd	Tb	Dy	Ho	Er	Tm	Yb	Lu	La/YbN	Eu/Eu*
Namibia - Huab (fine, aerosols)
H129F	20°53'53.76"S/ 13°29'24.47"E	0.725315	9.64	0.511787	7.54	-16.5955	19.2601	0.000556	15.7589	0.000476	39.5323	0.001682	1.22217	2.50857
H130F	20°53'53.81"S/ 13°29'24.48"E	0.726885	21	0.511814	12.84	-16.0675	19.3097	0.001096	15.7652	0.00102	39.6317	0.0026	1.22483	2.51387
H132F	20°53'56.95"S/ 13°29'25.03"E	0.725052	13.18	0.511735	1.664e-05	-17.6097	na	na	na	na	na	na	na	na
H133F	20°54'0.33"S/ 13°29'25.17"E	0.726816	8.62	0.511814	8.08	-16.0799	19.3204	0.000918	15.7654	0.000724	39.6169	0.00202	1.22549	2.5129
H135F	20°54'3.47"S/ 13°29'27.15"E	0.724938	10.42	0.5118	6.3	-16.3387	19.2837	0.000978	15.7606	0.00086	39.5719	0.00238	1.22354	2.51082
H136F	20°54'3.47"S/ 13°29'27.09"E	0.727871	23.8	0.51177	11	-16.89	19.3169	0.000724	15.7686	0.00065	39.6406	0.001722	1.22502	2.51389
Namibia - Huab (Bulk)
H127B	20°53'50.21"S/ 13°29'24.76"E	0.727861	11.74	0.511812	8.2	-16.1156	19.208	0.00059	15.7367	0.000588	39.3802	0.001502	1.22058	2.50244	42.2565	86.8533	10.0351	42.6487	7.07087	1.39962	6.16323	0.934627	5.29105	1.05752	2.9698	0.451259	2.87122	0.427311	1.07927	0.996287
H129B	20°53'53.76"S/ 13°29'24.47"E	0.726097	10.92	0.511842	9.66	-15.537	18.935	0.000524	15.7167	0.000478	39.0246	0.001318	1.20477	2.48301	26.9625	50.3816	6.66298	25.18	5.01074	1.15666	4.61387	0.718688	4.20705	0.854635	2.4393	0.371068	2.40542	0.356102	0.821996	1.13042
H130B	20°53'53.81"S/ 13°29'24.48"E	0.725673	10.18	0.511823	4.1	-15.8979	19.14	0.000616	15.7337	0.00058	39.3378	0.001468	1.2165	2.50023	40.1391	87.469	9.42577	34.4356	6.43914	1.1414	5.53102	0.816612	4.56035	0.911143	2.54589	0.380757	2.43242	0.362196	1.21013	0.898746
H131B	20°53'56.92"S/ 13°29'25.04"E	0.725511	10.14	0.511763	8.8	-17.0733	19.3207	0.000678	15.7495	0.000542	39.624	0.001462	1.22674	2.51588	40.1391	87.469	9.42577	34.4356	6.43914	1.1414	5.53102	0.816612	4.56035	0.911143	2.54589	0.380757	2.43242	0.362196	1.21013	0.898746
H132B	20°53'56.95"S/ 13°29'25.03"E	0.726062	11	0.511721	7	-17.8877	19.3588	0.000522	15.7535	0.000572	39.6508	0.001384	1.22886	2.51696	47.3589	104.647	11.0929	40.7015	7.4836	1.31083	6.45777	0.957018	5.36706	1.07465	3.007	0.453806	2.90199	0.436923	1.19676	0.886064
H133B	20°54'0.33"S/ 13°29'25.17"E	0.727678	9.3	0.511783	7.46	-16.6741	19.1257	0.00069	15.7304	0.000588	39.2974	0.001434	1.21584	2.49819	42.2026	86.5219	9.99605	37.1164	7.19398	1.44891	6.39587	0.967966	5.54038	1.1119	3.15003	0.478262	3.06114	0.453393	1.01101	1.00374
H135B	20°54'3.47"S/ 13°29'27.15"E	0.725425	10.58	0.511806	9.34	-16.221	19.1265	0.000752	15.7299	0.000576	39.2578	0.001494	1.21593	2.49575	42.6471	89.4094	10.1398	37.58	7.15782	1.42163	6.45995	0.974014	5.56211	1.12754	3.19452	0.49138	3.08926	0.459281	1.01236	0.982419
H136B	20°54'3.47"S/ 13°29'27.09"E	0.727287	11.9	0.511796	4.5	-16.4328	19.1638	0.00063	15.7349	0.000584	39.3988	0.001476	1.21792	2.50391	44.1537	92.3694	10.3513	38.4355	7.14926	1.41064	5.8791	0.955008	5.5653	1.11419	3.13337	0.462853	2.98283	0.459199	1.08553	1.02246
H137B	20°54'6.22"S/ 13°29'29.03"E	0.728177	8.8	0.51177	8.3	-16.9225	19.2584	0.0004	15.7424	0.00037	39.4557	0.001086	1.22335	2.50633	53.0008	115.085	12.5445	46.4104	8.73757	1.65197	7.72349	1.15969	6.57169	1.31482	3.7115	0.560326	3.55781	0.521388	1.09245	0.944964
Namibia - Omaruru (Bulk)
O40B	22° 2'42.79"S/ 14°20'2.44"E	0.724303	11	0.512003	27	-12.3935	19.0749	0.001812	15.7384	0.001362	39.1644	0.00348	1.212	2.48846
O46B	22° 2'42.84"S/ 14°20'2.43"E	0.730591	11.78	0.512045	4	-11.5675	18.9532	0.000552	15.6977	0.00048	39.0546	0.0014	1.20738	2.48792	34.4825	68.131	8.18326	29.9418	5.36822	0.964711	4.2144	0.633842	3.42816	0.616447	1.64691	0.233987	1.41455	0.205956	1.78765	0.95308
O47B	22° 2'41.45"S/ 14°20'3.34"E	0.724052	9	0.512007	6.72e-06	-12.3027	na	na	na	na	na	na
O51B	22° 2'41.87"S/ 14°20'2.01"E	0.738454	37.4	0.512116	4	-10.1772	18.5044	0.00061	15.6684	0.00057	38.2305	0.00152	1.181	2.43997	4.36575	10.8856	0.981045	3.6727	0.748797	0.27314	0.60643	0.106715	0.600947	0.117907	0.324115	0.0490815	0.317403	0.0496093	1.00867	1.90471
O54B	22° 2'41.92"S/ 14°20'1.64"E	0.724644	9	0.51202	3	-12.0582	na	na	na	na	na	na
O58B	22° 2'42.95"S/ 14°20'0.30"E	0.725243	11	0.511992	7	-12.6082	na	na	na	na	na	na
O75B	22° 2'36.36"S/ 14°19'57.19"E	0.732943	10.48	0.512096	4.82	-10.5737	18.5876	0.00065	15.673	0.000556	38.2733	0.001268	1.18596	2.44198	4.47988	11.0936	1.03635	3.89254	0.779073	0.201418	0.608475	0.101386	0.549934	0.104454	0.283467	0.0432153	0.281933	0.0447975	1.16526	1.37468
Namibia - Kuiseb (Bulk)
K85B	23° 7'42.57"S/ 14°35'19.88"E	0.721745	8	0.512001	9	-12.4353	20.1622	0.000606	15.785	0.000444	41.2358	0.001274	1.2773	2.61234	125.977	253.948	31.2939	116.249	22.2185	2.62163	17.6917	2.39961	12.384	2.22803	6.02772	0.89766	5.94812	0.889058	1.55315	0.621364
K88B	23° 7'42.65"S/ 14°35'20.00"E	0.721773	10	0.512017	12	-12.107	20.1107	0.000708	15.7861	0.000532	41.2194	0.001544	1.27395	2.61112	73.6647	146.73	18.1006	67.7953	13.9316	1.95068	12.1241	1.79638	10.0929	1.91477	5.34282	0.809916	5.62933	0.80068	0.959632	0.705304
K91B	23° 7'41.41"S/ 14°35'18.80"E	0.720812	10	0.511982	8	-12.8038	na	na	na	na	na	na	na	na	293.545	595.791	72.3423	256.701	48.2919	4.64479	36.3364	4.60835	22.0845	3.74584	9.71271	1.41135	9.03976	1.36135	2.38133	0.521043
K110B	23° 7'45.73"S/ 14°35'24.26"E	0.725347	9	0.512035	9	-11.7579	19.6748	0.000738	15.7546	0.000534	40.0345	0.001514	1.24883	2.54113	68.7402	137.912	17.2521	65.1092	13.508	2.29921	11.4737	1.77162	9.88716	1.90498	5.19775	0.771419	5.08591	0.763678	0.99116	0.867857
K113B	23° 7'50.18"S/ 14°35'28.58"E	0.721938	10	0.511981	8	-12.8077	20.0768	0.00081	15.7861	0.000518	40.9216	0.001892	1.2718	2.59226	204.998	412.701	49.7798	182.629	34.4913	3.52016	26.5034	3.41573	16.2499	2.80183	7.33277	1.05345	6.76768	1.02732	2.22132	0.547108
KB	23° 7'50.18"S/ 14°35'28.58"E	0.728857	11.54	0.512083	4.02	-10.8311	19.3933	0.000684	15.7594	0.00061	39.3292	0.00149	1.23059	2.4956	66.1311	146.068	16.4147	63.5787	12.7791	2.34041	10.7645	1.60764	8.54178	1.56058	4.0193	0.566853	3.49195	0.522454	1.3888	0.937696
Namibia Sea Sand
Sesriem Dune (Bulk)	24°28'60.00"S/ 15°48'0.00"E	0.713849	15	0.512109	8	-10.3272	18.0484	0.000536	15.6363	0.000418	38.1768	0.001082	1.15427	2.44155
Sesriem Dune (Fine, <5 um)*		0.728468	10	0.512097	27	-10.5567	18.7297	0.00306	15.6903	0.00185	38.7865	0.00544	1.19372	2.47201
Soussusvlei (Bulk)	24°41'60.00"S/ 15°16'60.00"E	0.712348	9	0.512057	9	-11.3329	18.3876	0.000506	15.6663	0.000554	38.1344	0.001344	1.1737	2.43417
Soussusvlei (Fine,<5 um)*		0.728166	10	0.512049	7	-11.4817	18.8628	0.001638	15.6997	0.001072	38.7107	0.00344	1.20147	2.46569
Kuiseb River (Bulk)	23° 5'55.24"S/ 14°30'0.00"E	0.715762	16	0.512118	9	-10.1375	18.1126	0.000552	15.6388	0.000528	38.0462	0.001464	1.15818	2.4328
Kuiseb River (Fine,<5 um)*		0.730549	10	0.512115	40	-10.2103	18.6096	0.000922	15.6761	0.000508	38.5729	0.001484	1.18714	2.46062
Soussusvlei Sune_1(Bulk)	24°41'60.00"S/ 15°16'60.00"E	0.712713	16	0.512133	8	-9.84294	18.1376	0.0005	15.6371	0.000484	37.9323	0.00118	1.1599	2.42578
Soussusvlei Dune_1 (Fine, <5 um)*		0.728284	9	0.512139	29	-9.73046	18.4622	0.00514	15.6655	0.00414	38.3239	0.00106	1.17852	2.44638
Soussusvlei Dune_2 (Bulk)	24°41'14.99"S/ 15°21'16.08"E	0.722343	9	0.512078	9	-10.92	18.9299	0.000748	15.7075	0.000672	38.7569	0.001646	1.20515	2.46742	43.718	88.1266	10.1883	37.9474	7.59543	1.42507	6.67291	1.03326	6.0451	1.19317	3.28915	0.497786	3.17399	0.478615	1.01008	0.940625
Soussusvlei Sune_2 (Fine, <5 um)		0.726443	9	0.512079	9	-10.9135	18.9453	0.000666	15.7083	0.000592	38.7682	0.00162	1.20607	2.468
*Southern Africa Samples Re-analized from Delmonte et al. (2004a) and Vallelonga et al. (2010)

## Sheet: Table S2
Table S2: End-member values used to calculate Sr–Pb tri-hyperbola in Fig. 5.
	Patagonia	Southern Altiplano	Northern Puna	Southern Africa
87Sr/86Sr	0.7064	0.7107	0.7234	0.7263
εNd(0)	0.58	-9.64	-10.28	-14.38
[Sr]	215	479	212	158
[Nd]	18	33	22	54
